# Supplementary material
Source: Springer Nature journal article supplement (https://www.springermedizin.de/resource/supplementary/12968_2013_3359_MOESM3_ESM.pdf/9583500)

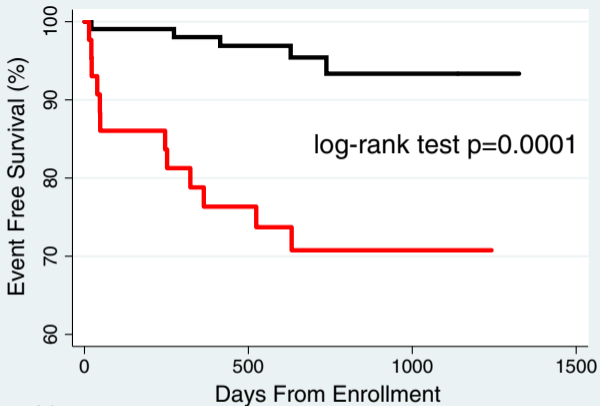

| Number at risk      |     |    |    |   |
|---------------------|-----|----|----|---|
| No Perfusion Defect | 106 | 78 | 15 | 0 |
| Perfusion Defect    | 43  | 30 | 6  | 0 |

  

|                                                                                   |                     |                                                                                    |                  |
|-----------------------------------------------------------------------------------|---------------------|------------------------------------------------------------------------------------|------------------|
|  | No Perfusion Defect |  | Perfusion Defect |
|-----------------------------------------------------------------------------------|---------------------|------------------------------------------------------------------------------------|------------------|

Supplement: MOESM3 [file 9583500]
